# Supplementary material for: Atmospheric pressure plasma liquid assisted deposition of polydopamine/acrylate copolymer on zirconia (Y-TZP) ceramics: a biocompatible and adherent nanofilm
Source: Royal Society of Chemistry journal article supplement (doi:10.1039/d1ra02054d), 2021-01-01
Supplement: d1ra02054d1.pdf [file d1ra02054d1.pdf]

# **Atmospheric pressure plasma liquid assisted deposition of polydopamine/acrylate copolymer on zirconia (Y-TZP) ceramics: a biocompatible and adherent nanofilm**

*Ludmila Hodásová,<sup>1,2,3</sup> Robert Quintana,<sup>4\*</sup> Urszula Czuba,<sup>4</sup> Luis J. del Valle,<sup>1,3</sup> Gemma Fargas,<sup>2,3</sup> Carlos Alemán,<sup>1,3</sup> Elaine Armelin<sup>1,3\*</sup>*

<sup>1</sup> Departament d'Enginyeria Química, Universitat Politècnica de Catalunya, Campus Diagonal Besòs (EEBE), C/ Eduard Maristany, 10-14, Building I, 2nd floor, 08019, Barcelona, Spain.

<sup>2</sup> Departament de Ciència i Enginyeria de Materials, Universitat Politècnica de Catalunya, Campus Diagonal Besòs - EEBE, C/ Eduard Maristany, 10-14, Building I, 1st floor, 08019, Barcelona, Spain.

<sup>3</sup> Barcelona Research Center for Multiscale Science and Engineering, Universitat Politècnica de Catalunya, Campus Diagonal Besòs (EEBE), C/ Eduard Maristany, 10-14, Building I, basement floor, 08019, Barcelona, Spain.

<sup>4</sup> Luxembourg Institute of Science and Technology (LIST), Materials Research and Technology Department, L-4422 Belvaux, Luxembourg.

*Corresponding authors:* [elaine.armelin@upc.edu](mailto:elaine.armelin@upc.edu) and [roberto.quintana@list.lu](mailto:roberto.quintana@list.lu)

### 3. Results and discussion

#### 3.1. Success of atmospheric-pressure plasma deposition of poly(EGDMA-co-DOMAm) in zirconia substrates activated by oxygen plasma

**Table S1.** Chemical composition and main properties of 3Y-TZP discs.

|                             |                                         |                               |                                |
|-----------------------------|-----------------------------------------|-------------------------------|--------------------------------|
| Chemical composition        | ZrO <sub>2</sub>                        | Y <sub>2</sub> O <sub>3</sub> | Al <sub>2</sub> O <sub>3</sub> |
|                             | 94.55 %                                 | 5.2 %                         | 0.25 %                         |
| Sintering temperature       | 1450 °C                                 |                               |                                |
| Density                     | 6.05 g/cm <sup>3</sup>                  |                               |                                |
| Hardness                    | 14-15 GPa                               |                               |                                |
| Young's modulus             | 230 GPa                                 |                               |                                |
| Dielectric constant [1 MHz] | 32.7                                    |                               |                                |
| Dielectric loss [1 MHz]     | 0.006                                   |                               |                                |
| Thermal conductivity        | 3 W/(m·K)                               |                               |                                |
| Thermal expansion           | 9.6 × 10 <sup>-6</sup> m/°C (25–300 °C) |                               |                                |

**Table S2.** XPS atomic composition of the zirconia disc sample coated with pPoly(EGDMA-co-DOMAm) by atmospheric plasma deposition.

| Element      | Atomic concentration (%) |
|--------------|--------------------------|
| <b>C 1s</b>  | 63.0                     |
| <b>O 1s</b>  | 30.7                     |
| <b>N 1s</b>  | 1.4                      |
| <b>Zr 3d</b> | 4.3                      |
| <b>Y 3d</b>  | 0.6                      |

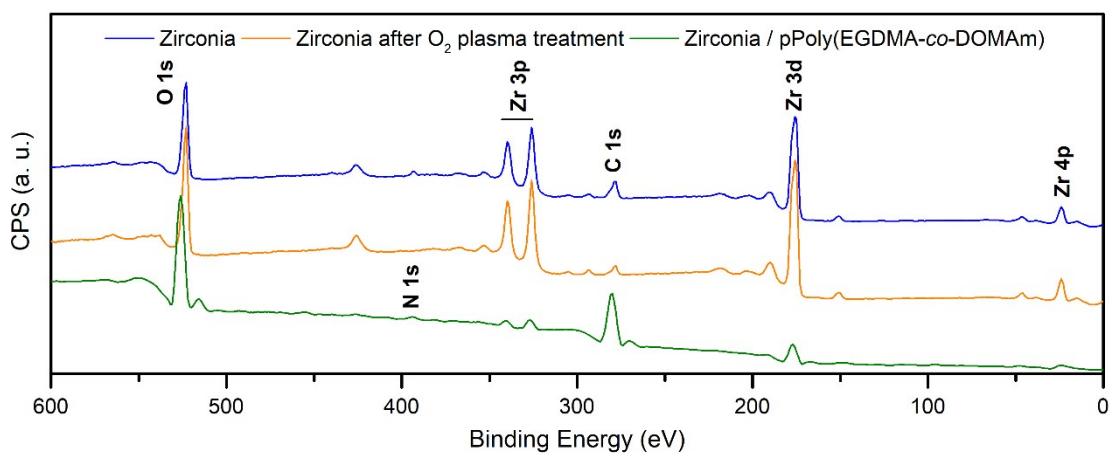

**Figure S1.** Survey XPS spectra of the pristine zirconia discs (upper plot), after standard oxygen plasma treatment protocol (SP) (middle plot) and coated with pPoly(EGDMA-*co*-DOMAm) (bottom plot).

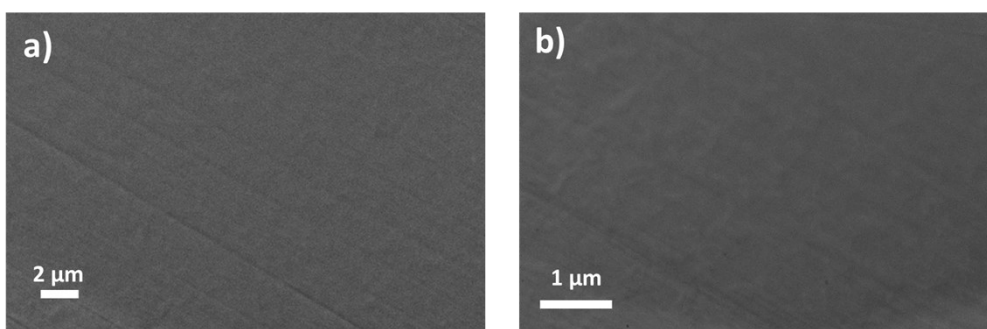

**Figure S2.** SEM micrographs taken from the pPoly(EGDMA-*co*-DOMAm) film surface, after LA-APPiP polymerization: a) 5 kX of magnification and b) 15 kX of magnification.
